# Supplementary material
Source: publisher figshare collection journal article supplement (https://asha.figshare.com/articles/dataset/_/11625543)
Supplement: Supplementary file 3 [file 1]

## **Supplemental Material S1. Semi-structured interview guide.**

1. Tell me a little about you and your family.
2. Tell me a little more about [child's name].
3. Families often report that their children communicate and express themselves in many different ways. How does [child's name] communicate with you and your family?
4. What are some of the things that [child's name] can do best and likes to do? (Crais, 2011)
  - How (if at all) does [child's name] AAC technology help him/her to participate in these activities?
5. What are some of the things you'd like [child's name] to be able to do? (things that s/he is not doing now) (Crais, 2011)
  - How (if at all) could [child's name] AAC technology help him/her to do these things?
    - What aspects of [child's name] current AAC technology (if any) help him/her to achieve these goals?
    - What aspects of [child's name] current AAC technology (if any) present barriers to meeting these goals?
6. Who are the most important people in [child's name] life?
  - Of these people, who (if anyone) does [child's name] currently use his/her AAC technology to communicate with?
  - Who (if anyone) would you like [child's name] to be able to use his/her AAC device to communicate with?
    - What aspects of [child's name] AAC technology help him/her child to interact with these individuals?
    - What aspects of [child's name] AAC technology present barriers to your child interacting with these individuals?
7. One goal when providing AAC technologies is that they can fit into existing family activities and routines. I'd like to know a little bit about your child's daily routines and activities. Tell me a little bit about your day. (McWilliam, 2010; Wilcox & Woods, 2011)
  - What are the activities or routines that occur most often for you and your child?
8. How does AAC fit into these daily activities? (McWilliam, 2010; Wilcox & Woods, 2011)
  - In which (if any) of these activities does your child currently use his/her AAC device?
  - In which (if any) of these activities do you think your child could benefit from using AAC?
  - What aspects of [child's name] AAC technology help him/her to participate in these activities?
  - What aspects of [child's name] AAC technology present barriers to your child participating in these activities?

9. Parents may want to take different roles in supporting their child to use AAC. What do you see as being your role in helping [child's name] use his/her AAC technology? (Anderson et al., 2014)

- What aspects of the technology make it easy to do that?
- What aspects of the technology (if any) make it challenging to do that?

10. Imagine you were not limited to existing AAC technologies and you could design an ideal AAC device that would meet your child's needs and your family's needs. Tell me about what that system would look like.

11. That covers the things I wanted to cover. Anything else you'd like to add?
